# Supplementary material for: A Case Study of Complex Policy Design: The Systems Engineering Approach
Source: Hindawi journal article supplement (doi:10.1155/2019/7643685), 2019-01-01
Supplement: f1 [file 7643685.f1.pdf]

## **APPENDIX A:**

List of questions used in the first day of the workshop for building the MA matrix

1. Who are the potential stakeholders of the problem case to be involved in decision-making?
2. What policy instruments or policy measures have to be considered in the case study?
3. What are the legislation documents e.g. what European Directives do you use?
4. What ISO Standards do you use? E.g. What kind of training do you organize?
5. What methods for decision-making do you use?
6. Which are the aspects you are focused mostly as following: legal, financial, social, technical, and environmental?
7. What are the most significant - effective policies in your organization? Give an example.
8. Why these specific policy measures are most effective in your case?
9. Do you measure the policy in terms of time, cost and benefits?
10. How do you implement the identified policies?
11. What are the major problems or challenges that are shown during the implementation phase (e.g. Loops and bottlenecks)?

**APPENDIX B.** Blank morphological matrix used in the first day of the workshop.

| <b>Parameters</b><br><b>Values</b> | <b>P1</b> | <b>P2</b> | <b>P3</b> | <b>P4</b> | <b>P5</b> |
|------------------------------------|-----------|-----------|-----------|-----------|-----------|
| <b>V1</b>                          |           |           |           |           |           |
| <b>V2</b>                          |           |           |           |           |           |
| <b>V3</b>                          |           |           |           |           |           |
| <b>V4</b>                          |           |           |           |           |           |
| <b>V5</b>                          |           |           |           |           |           |
| <b>V6</b>                          |           |           |           |           |           |
| <b>V7</b>                          |           |           |           |           |           |

|                                                                                                                            | Temperature = 40°C, Settleable | COD = 8 - 23 kg/ADt, AOX< | Temperature increase no more | DO = 5 mg/l, minimum | Separation of uncontaminated | Cooling towers | Oxygen delignification, | Extended aeration | Collecting, control, recycling | Storage lagoons | Training for safety measures | Training for general | Training for operators of the | River water (Authc | Untreated effluent quality | Treated effluent q | Groundwater (especially in the (near landfill) | Outlet of storm water lagoons |
|----------------------------------------------------------------------------------------------------------------------------|--------------------------------|---------------------------|------------------------------|----------------------|------------------------------|----------------|-------------------------|-------------------|--------------------------------|-----------------|------------------------------|----------------------|-------------------------------|--------------------|----------------------------|--------------------|------------------------------------------------|-------------------------------|
| Conama 20 Requirements -                                                                                                   |                                |                           |                              |                      |                              |                |                         |                   |                                |                 |                              |                      |                               |                    |                            |                    |                                                |                               |
| EU- BAT Bref (2001)                                                                                                        |                                |                           |                              |                      |                              |                |                         |                   |                                |                 |                              |                      |                               |                    |                            |                    |                                                |                               |
| World Bank/IFC EHS Guidelines                                                                                              |                                |                           |                              |                      |                              |                |                         |                   |                                |                 |                              |                      |                               |                    |                            |                    |                                                |                               |
| Quality Requirements (Class II)                                                                                            |                                |                           |                              |                      |                              |                |                         |                   |                                |                 |                              |                      |                               |                    |                            |                    |                                                |                               |
| Saving of water                                                                                                            |                                |                           |                              |                      |                              |                |                         |                   |                                |                 |                              |                      |                               |                    |                            |                    |                                                |                               |
| Storm water control                                                                                                        |                                |                           |                              |                      |                              |                |                         |                   |                                |                 |                              |                      |                               |                    |                            |                    |                                                |                               |
| Settleable solids = 1 ml/1 L                                                                                               |                                |                           |                              |                      |                              |                |                         |                   |                                |                 |                              |                      |                               |                    |                            |                    |                                                |                               |
| COD = 8 - 23 kg/ADt, AOX< 0.25 kg/ADt                                                                                      |                                |                           |                              |                      |                              |                |                         |                   |                                |                 |                              |                      |                               |                    |                            |                    |                                                |                               |
| no more than 3°C at mixing zone                                                                                            |                                |                           |                              |                      |                              |                |                         |                   |                                |                 |                              |                      |                               |                    |                            |                    |                                                |                               |
| Maximum                                                                                                                    |                                |                           |                              |                      |                              |                |                         |                   |                                |                 |                              |                      |                               |                    |                            |                    |                                                |                               |
| uncontaminated and contaminated storm                                                                                      |                                |                           |                              |                      |                              |                |                         |                   |                                |                 |                              |                      |                               |                    |                            |                    |                                                |                               |
| Cooling towers delignification, ECF bleaching                                                                              |                                |                           |                              |                      |                              |                |                         |                   |                                |                 |                              |                      |                               |                    |                            |                    |                                                |                               |
| Extended aeration recycling used clean waters                                                                              |                                |                           |                              |                      |                              |                |                         |                   |                                |                 |                              |                      |                               |                    |                            |                    |                                                |                               |
| Storage lagoons measures in the working place (for all) environmental aspects (for workers of the effluent treatment plant |                                |                           |                              |                      |                              |                |                         |                   |                                |                 |                              |                      |                               |                    |                            |                    |                                                |                               |

APPENDIX C: Cross-consistency assessment (CCA) matrix used in the second day of workshop
